# Supplementary material for: Genome Size Variation Assessment in Vitis vinifera L. Landraces in Ibiza and Formentera (Balearic Islands)
Source: MDPI journal article supplement (doi:10.3390/plants11141892), 2022-07-21
Supplement: s1 [file s1]

## SUPPLEMENTARY MATERIALS

**Table S1:** Results of Tukey's test showing statistically significant differences between means on all cultivars and landraces.

| Cultivar/ Landrace (i) | Cultivar/ Landrace (j) | Average differences (i-j) | Error deviation | P < 0.05 | Lower limit | Higher limit |
|------------------------|------------------------|---------------------------|-----------------|----------|-------------|--------------|
| AG2                    | Santa Magdalena        | -0.1129                   | 0.0279          | 0.014    | -0.2140     | -0.0118      |
| AG1                    | Garnatxa               | 0.1395                    | 0.0381          | 0.046    | 0.0012      | 0.2778       |
| Santa Magdalena        | AG2                    | 0.1129                    | 0.0279          | 0.014    | 0.0118      | 0.2140       |
|                        | Valenci tinto/         |                           |                 |          |             |              |
| Santa Magdalena        | Grumier                | 0.1655                    | 0.0372          | 0.003    | 0.0308      | 0.3003       |
| Santa Magdalena        | Garnatxa               | 0.1872                    | 0.0398          | 0.001    | 0.0430      | 0.3315       |
| Danugue                | Garnatxa               | 0.1501                    | 0.0410          | 0.045    | 0.0016      | 0.2987       |
| Valenci tinto/ Grumier | Santa Magdalena        | -0.1655                   | 0.0372          | 0.003    | -0.3003     | -0.0308      |
| Garnatxa               | AG1                    | -0.1395                   | 0.0381          | 0.046    | -0.2778     | -0.0012      |
| Garnatxa               | Santa Magdalena        | -0.1872                   | 0.0398          | 0.001    | -0.3315     | -0.0430      |
| Garnatxa               | Danugue                | -0.1501                   | 0.0410          | 0.045    | -0.2987     | -0.0016      |

**Table S2:** Results of Tukey's test showing statistically significant differences on Ibiza cultivars and landraces.

| Cultivar/ Landrace (i) | Cultivar/ Landrace (j) | Average differences (i-j) | Error deviation | P < 0.05 | Lower limit | Higher limit |
|------------------------|------------------------|---------------------------|-----------------|----------|-------------|--------------|
| AG2                    | Santa Magdalena        | -0.1138                   | 0.0285          | 0.013    | -0.2145     | -0.0132      |
| AG1                    | Valenci tinto/Grumier  | 0.1305                    | 0.0365          | 0.044    | 0.0017      | 0.2592       |
| Santa Magdalena        | AG2                    | 0.1138                    | 0.0285          | 0.013    | 0.0132      | 0.2145       |
| Santa Magdalena        | Valenci tinto/Grumier  | 0.1655                    | 0.0365          | 0.002    | 0.0367      | 0.2943       |
| Danugue                | Valenci tinto/Grumier  | 0.1909                    | 0.0455          | 0.007    | 0.0303      | 0.3516       |
| Valenci tinto/ Grumier | AG1                    | -0.1305                   | 0.0365          | 0.044    | -0.2592     | -0.0017      |
| Valenci tinto/ Grumier | Santa Magdalena        | -0.1655                   | 0.0365          | 0.002    | -0.2943     | -0.0367      |
| Valenci tinto/ Grumier | Danugue                | -0.1909                   | 0.0455          | 0.007    | -0.3516     | -0.0303      |

**Table S3:** Results of Tukey's test showing statistically significant differences on Formentera cultivars and landraces.

| Cultivar/ Landrace (i) | Cultivar/ Landrace (j) | Average differences (i-j) | Error deviation | P < 0.05 | Lower limit | Higher limit |
|------------------------|------------------------|---------------------------|-----------------|----------|-------------|--------------|
| Moscatell              | Garnatxa               | 0.1681                    | 0.0421          | 0.013    | 0.0269      | 0.3094       |
| Garnatxa               | Moscatell              | -0.1681                   | 0.0421          | 0.013    | -0.3094     | -0.0269      |
| Garnatxa               | Quigat                 | -0.1420                   | 0.0421          | 0.048    | -0.2832     | -0.0008      |
| Quigat                 | Garnatxa               | 0.1420                    | 0.0421          | 0.048    | 0.0008      | 0.2832       |

**Table S4:** Origin, voucher number, collectors and dates of the studied material.

| Taxon (code) | Voucher number | Origin, collectors and date |
|--------------|----------------|-----------------------------|
|--------------|----------------|-----------------------------|

|                                                       |           |                                                                                                  |
|-------------------------------------------------------|-----------|--------------------------------------------------------------------------------------------------|
| <i>Vitis vinifera</i> L. 'Beba' (1)                   | BC-992593 | Ibiza, Balearic Islands: private vineyard near Sant Agustí des Vedrà, González, 02 July 2018     |
| <i>Vitis vinifera</i> L. 'Valenci tinto/Grumier' (2)  | BC-992594 | Ibiza, Balearic Islands: private vineyard near Sant Agustí des Vedrà, González, 02 July 2018     |
| <i>Vitis vinifera</i> L. 'Moscatell' (3)              | BC-992595 | Ibiza, Balearic Islands: private vineyard near Sant Agustí des Vedrà, González, 02 July 2018     |
| <i>Vitis vinifera</i> L. 'AG2' (5)                    | BC-992596 | Ibiza, Balearic Islands: private vineyard near Sant Agustí des Vedrà, González, 02 July 2018     |
| <i>Vitis vinifera</i> L. 'Teta de vaca' (6)           | BC-992597 | Ibiza, Balearic Islands: private vineyard near Sant Josep de sa Talaia, González, 31 July 2017   |
| <i>Vitis vinifera</i> L. 'Beba' (7)*                  | BC-992598 | Ibiza, Balearic Islands: private vineyard near Sant Josep de sa Talaia, González, 31 July 2017   |
| <i>Vitis vinifera</i> L. 'Morzacà' (8)*               | BC-992599 | Ibiza, Balearic Islands: private vineyard near Sant Josep de sa Talaia, González, 31 July 2017   |
| <i>Vitis vinifera</i> L. 'Grec' (9)*                  | BC-992600 | Ibiza, Balearic Islands: private vineyard near Sant Josep de sa Talaia, González, 31 July 2017   |
| <i>Vitis vinifera</i> L. 'AG1' (10)*                  | BC-992601 | Ibiza, Balearic Islands: private vineyard near Sant Josep de sa Talaia, González, 31 July 2017   |
| <i>Vitis vinifera</i> L. 'Sultanita' (11)             | BC-992602 | Ibiza, Balearic Islands: private vineyard near Sant Josep de sa Talaia, González, 31 July 2017   |
| <i>Vitis vinifera</i> L. 'Fresa' (12)*                | BC-992603 | Ibiza, Balearic Islands: private vineyard near Sant Josep de sa Talaia, González, 31 July 2017   |
| <i>Vitis vinifera</i> L. 'Santa Magdalena' (13)       | BC-992604 | Ibiza, Balearic Islands: private vineyard near Sant Josep de sa Talaia, González, 31 July 2017   |
| <i>Vitis vinifera</i> L. 'Danugue' (14)               | BC-992628 | Ibiza, Balearic Islands: private vineyard near Ibiza town, González, 31 July 2017                |
| <i>Vitis vinifera</i> L. 'Maçanet' (15)*              | BC-992605 | Ibiza, Balearic Islands: private vineyard near Ibiza town, González, 31 July 2017                |
| <i>Vitis vinifera</i> L. 'Callet negrella' (16)       | BC-992606 | Ibiza, Balearic Islands: private vineyard near Ibiza town, González, 31 July 2017                |
| <i>Vitis vinifera</i> L. 'Fogoneu' (17)               | BC-992607 | Ibiza, Balearic Islands: private vineyard near Ibiza town, González, 31 July 2017                |
| <i>Vitis vinifera</i> L. 'Vermellea' (18)*            | BC-992608 | Ibiza, Balearic Islands: private vineyard near Ibiza town, González, 31 July 2017                |
| <i>Vitis vinifera</i> L. 'Grec' (19)*                 | BC-992609 | Ibiza, Balearic Islands: private vineyard near Sant Josep de sa Talaia, González, 31 July 2017   |
| <i>Vitis vinifera</i> L. 'Valenci tinto/Grumier' (20) | BC-992610 | Ibiza, Balearic Islands: private vineyard near Sant Jordi de ses Salines, González, 31 July 2017 |
| <i>Vitis vinifera</i> L. 'Santa Magdalena' (21)       | BC-992611 | Ibiza, Balearic Islands: private vineyard near Sant Josep de sa Talaia, González, 25 July 2017   |
| <i>Vitis vinifera</i> L. 'AG2' (22)                   | BC-992612 | Ibiza, Balearic Islands: private vineyard in Es Cubells, González, 02 July 2017                  |
| <i>Vitis vinifera</i> L. 'AG2' (23)                   | BC-992613 | Ibiza, Balearic Islands: private vineyard in Es Cubells, González, 24 July 2017                  |
| <i>Vitis vinifera</i> L. 'AG1' (24)*                  | BC-992614 | Ibiza, Balearic Islands: private vineyard in Es Cubells, González, 24 July 2017                  |
| <i>Vitis vinifera</i> L. 'Colló de gall' (25)*        | BC-992615 | Ibiza, Balearic Islands: private vineyard in Es Cubells, González, 24 July 2017                  |

|                                               |           |                                                                                        |
|-----------------------------------------------|-----------|----------------------------------------------------------------------------------------|
| <i>Vitis vinifera</i> L. 'Beba' (26)          | BC-992616 | Ibiza, Balearic Islands: private vineyard near Es Cubells, González, 02 July 2017      |
| <i>Vitis vinifera</i> L. 'Danugue' (27)       | BC-992617 | Ibiza, Balearic Islands: private vineyard in Es Cubells, González, 24 July 2017        |
| <i>Vitis vinifera</i> L. 'AG1' (28)*          | BC-992618 | Ibiza, Balearic Islands: private vineyard in Es Cubells, González, 24 July 2017        |
| <i>Vitis vinifera</i> L. 'AG1' (29)*          | BC-992627 | Formentera, Balearic Islands: private vineyard near Ca Marí, González, 26 July 2017    |
| <i>Vitis vinifera</i> L. 'Manses tibbus' (30) | BC-992619 | Formentera, Balearic Islands: private vineyard near Ca Marí, González, 26 July 2017    |
| <i>Vitis vinifera</i> L. 'Garnatxa' (31)      | BC-992620 | Formentera, Balearic Islands: private vineyard near Ca Marí, González, 26 July 2017    |
| <i>Vitis vinifera</i> L. 'Tinto velasco' (32) | BC-992621 | Formentera, Balearic Islands: private vineyard near Ca Marí, González, 26 July 2017    |
| <i>Vitis vinifera</i> L. 'AG2' (33)           | BC-992622 | Formentera, Balearic Islands: private vineyard near Ca Marí, González, 26 July 2017    |
| <i>Vitis vinifera</i> L. 'Danugue' (34)       | BC-992623 | Formentera, Balearic Islands: private vineyard near Ca Marí, González, 26 July 2017    |
| <i>Vitis vinifera</i> L. 'Grec' (35)*         | BC-992624 | Formentera, Balearic Islands: private vineyard near Ca Marí, González, 17 July 2018    |
| <i>Vitis vinifera</i> L. 'AG1' (36)*          | BC-992625 | Formentera, Balearic Islands: private vineyard near Ca Marí, González, 17 July 2018    |
| <i>Vitis vinifera</i> L. 'Quigat' (37)        | BC-992626 | Formentera, Balearic Islands: private vineyard near Cala Saona, González, 17 July 2018 |

---

\*Ibiza and Formentera local landraces of *Vitis vinifera*. 'AG1' and 'AG2' are landraces that had not been catalogued previously therefore, they do not have a name yet.

Code (4) has not been considered in the study; we keep this accession for possible further work, but it had growth development issues and the informant was unsure of its origin and name.
